#### **AUTHOR CORRECTION**

In the Letter to the Editor by Benumof and Mazzei, published in the June 2002 issue of ANESTHESIOLOGY (2002; 96:1531-2), the Dupaco Prone-View foam cushion is mentioned. Readers should note that one of the authors (Dr. Mazzei) holds US Patent No. 6,112,333 on this device. This conflict of interest should have been disclosed at the time of original publication.
